# Supplementary material for: Predicting the epidemic threshold of the susceptible-infected-recovered model
Source: PubMed Central journal article supplement (PMC4835734; doi:10.1038/srep24676), 2016-04-19
Supplement: srep24676-s1.pdf [file srep24676-s1.pdf]

# Supporting Information for ‘Predicting the epidemic threshold of the susceptible-infected-recovered model’

Wei Wang,<sup>1,2,3</sup> Quan-Hui Liu,<sup>1,2</sup> Lin-Feng Zhong,<sup>1,2</sup> Ming Tang,<sup>1,2</sup> Hui Gao,<sup>1,2</sup> and H. Eugene Stanley<sup>3</sup>

<sup>1</sup>Web Sciences Center, University of Electronic Science and Technology of China, Chengdu 610054, China

<sup>2</sup>Big data research center, University of Electronic Science and Technology of China, Chengdu 610054, China

<sup>3</sup>Center for Polymer Studies and Department of Physics, Boston University, Boston, Massachusetts 02215, USA

(Dated: March 11, 2016)

## I. SYNCHRONOUS UPDATING METHOD FOR SIR MODEL

We implement the synchronous updating method [1] to renew the states of nodes in the SIR model. Initially, a node  $u$  is randomly selected as seed (infected), while the remaining nodes are susceptible. Two queues  $Q_1$  and  $Q_2$  are used to store nodes which are infected in previous steps and current step, respectively. At time step  $t = 0$ , put the seed node  $u$  into the end of  $Q_1$ . When  $t \geq 1$ , the updating processes at every time step are executed as follows: (1) Set  $t \rightarrow t + 1$ . (2) Every node in  $Q_1$  tries to transmit the disease to each neighbor  $v$ . If node  $v$  is susceptible,  $v$  becomes infected with probability  $\beta$ , and node  $v$  is put into the end of queue  $Q_2$ ; otherwise, nothing happens. (3) Every node  $u$  in  $Q_1$  recovers with probability  $\gamma$ . If node  $u$  recovers, we move it from  $Q_1$ . (4) Add all nodes of  $Q_2$  at the rear of  $Q_1$ , and delete all nodes in  $Q_2$ . Repeat steps (1)-(4) until all infected nodes become recovered. Finally, we count the fraction of nodes being in the recovered state, which is denoted as the epidemic size  $r$ .

## II. NUMERICAL IDENTIFYING EPIDEMIC THRESHOLD

We use the relative variance  $\chi$  to numerically determine the size-dependent critical value [2]

$$\chi = \frac{\langle r - \langle r \rangle \rangle^2}{\langle r^2 \rangle}, \quad (1)$$

where  $r$  denotes the final epidemic size and  $\langle \dots \rangle$  is the ensemble averaging. We use at least  $10^5$  independent dynamic realizations on a network to calculate the average value of  $\chi$ , which exhibits a maximum value at the epidemic outbreak threshold  $\lambda_c$ . This numerical prediction  $\lambda_c$  by observing  $\chi$  can be considered the accurate epidemic threshold.

Figure 1 shows how  $\lambda_c$  is located by observing  $\chi$  in a scale-free network and a California network. In scale-free networks with degree exponent  $\nu_D = 3.5$ , we find that the MFL and DMP methods produce results close to the accurate epidemic threshold  $\lambda_c$ . In the California network, the epidemic threshold predicted by MFL method is closer to  $\lambda_c$  than the two other methods.

## III. CORRELATED CONFIGURATION NETWORKS

We generate the correlated configuration networks according to the method in Ref. [3]. As shown in Fig. 2, the DMP method performs better than MFL and QMF methods.

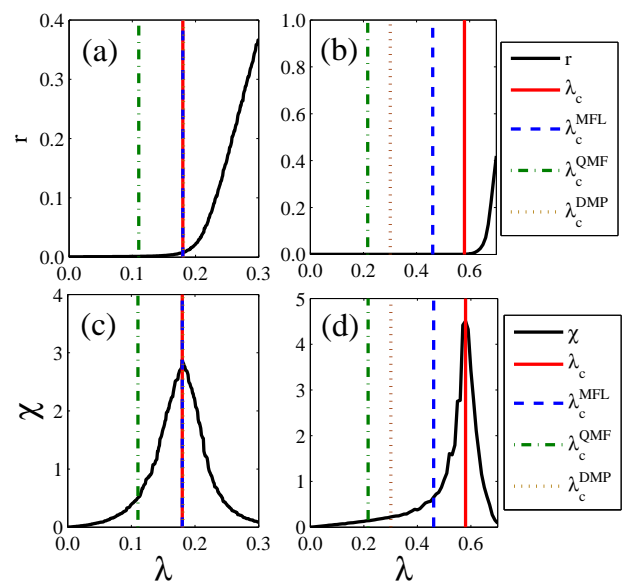

FIG. 1. (Color online) **Illustrations of the numerical identification of epidemic threshold.** The epidemic size  $r$  (a) and relative variance  $\chi$  (c) versus the effective spreading probability  $\lambda$  on scale-free networks with degree exponent  $\nu_D = 3.5$ . The epidemic size  $r$  (b) and relative variance  $\chi$  (d) versus  $\lambda$  for California network [22]. In (a) and (b), the solid black curves denote  $r$  and  $\chi$ , respectively. The four vertical lines are the epidemic thresholds which are predicted by the numerical simulations  $\lambda_c$  (red solid lines), MFL method  $\lambda_c^{\text{MFL}}$  (blue dashed lines), QMF method  $\lambda_c^{\text{QMF}}$  (green dash-dotted lines), and DMP method  $\lambda_c^{\text{DMP}}$  (purple dotted lines), respectively.

## IV. REAL-WORLD NETWORKS

In this paper, we predict the SIR epidemic threshold for 56 real-world networks, which are downloaded from website [4]. The 56 include social networks, coauthorship networks, metabolic networks, infrastructure networks, and citation networks. Table I displays their statistical characteristics in detail.

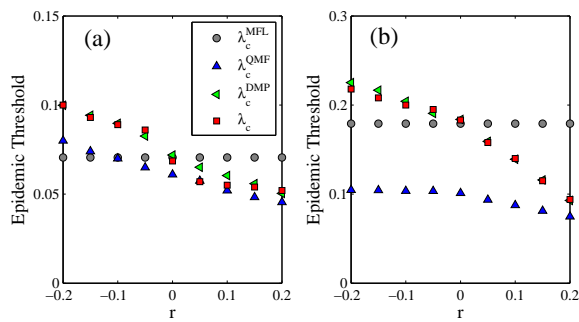

FIG. 2. (Color online) **Predicting epidemic thresholds for correlated configuration networks.** Theoretical predictions of  $\lambda_c^{\text{MFL}}$  (black circles),  $\lambda_c^{\text{QMF}}$  (blue up triangles),  $\lambda_c^{\text{DMP}}$  (green left triangles) and numerical predictions (red squares) as a function of degree-degree correlations  $r$  for degree exponent  $\nu_D = 2.1$  (a) and  $\nu_D = 3.5$  (b). The networks size is set to be  $N = 8,000$ .

- [1] Schonfisch, B. & De Roos, A. Synchronous and asynchronous updating in cellular automata. *Bio. Syst.* **51**, 123 (1999).
- [2] Chen, W., Schroder, M., & D'Souza, M. R. Microtransition Cascades to Percolation. *Phys. Rev. Lett.* **112**, 155701 (2014).
- [3] Van Mieghem, P., et al. Influence of assortativity and degree-preserving rewiring on the spectra of networks. *Eur. Phys. J. B* **76**(4), 643-652 (2010).
- [4] <http://konect.uni-koblenz.de/networks/>
- [5] Leskovec, J., Kleinberg, J. & Faloutsos, C. Graph evolution: Densification and shrinking diameters. *ACM Trans. Knowledge Discovery from Data.* **1**(1), 1-40 (2007).
- [6] Yang, J. & Leskovec, J. Defining and evaluating network communities based on ground-truth. *In Proc. ACM SIGKDD Workshop on Mining Data Semantics.* **3** (2012).
- [7] Massa, P., Salvetti, M., & Tomasoni, D. Bowling alone and trust decline in social network sites. *In Proc. Int. Conf. Dependable, Autonomic and Secure Computing.* 658-663 (2009).
- [8] McAuley, J. & Leskovec, J. Learning to discover social circles in ego networks. *In Advances in Neural Information Processing Systems.* 548-556 (2012).
- [9] Choudhury, M. D., et al. How does the data sampling strategy impact the discovery of information diffusion in social media? *In ICWSM.* 34-41 (2010).
- [10] McAuley, J. & Leskovec, J. Learning to discover social circles in ego networks. *In Advances in Neural Information Processing Systems.* 548-556 (2012).
- [11] Cho, E., Myers, S. A. & Leskovec, J. Friendship and mobility: User movement in location-based social networks. *In Proc. Int. Conf. on Knowledge Discovery and Data Mining.* 1082-1090 (2011).
- [12] Richardson, M., Agrawal, R. & Domingos, P. Trust management for the semantic web. *In The Semantic Web-ISWC.* 351-368 (2003).
- [13] Mislove, A., et al. Measurement and analysis of online social networks. *In Proc. Internet Measurement Conf.* (2007).
- [14] Viswanath, B., et al. On the evolution of user interaction in Facebook. *In Proc. Workshop on Online Social Networks.* 37-42 (2009).
- [15] Cho, E., Myers, S. A. & Leskovec, J. Friendship and mobility: User movement in location-based social networks. *In Proc. Int. Conf. on Knowledge Discovery and Data Mining.* 1082-1090 (2011).
- [16] Duch, J. & Arenas, A. Community detection in complex networks using extremal optimization. *Phys. Rev. E* **72**(2), 027104 (2005).
- [17] Joshi-Tope, G., et al. Reactome: A knowledgebase of biological pathways. *Nucleic Acids Research.* **33**, 428-432 (2005).
- [18] Ewing, R. M. et al. Large-scale mapping of human protein-protein interactions by mass spectrometry. *Molecular Systems Biology.* **3** (2007).
- [19] Stelzl, U., et al. A human protein-protein interaction network: A resource for annotating the proteome. *Cell.* **122**, 957-968 (2005).
- [20] Beuming, T., et al. PDZBase: A protein-protein interaction database for PDZ-domains. *Bioinformatics.* **21**(6), 827-828 (2005).
- [21] Rual, J.-F., et al. Towards a proteome-scale map of the human protein-protein interaction network. *Nature.* **7062**, 1173-1178 (2005).
- [22] Leskovec, J., et al. Statistical properties of community structure in large social and information networks. *In Proc. Int. World Wide Web Conf.* 695-704 (2008).
- [23] Šubelj, L. & Bajec, M. Robust network community detection using balanced propagation. *Eur. Phys. J. B.* **81**(3), 353-362 (2011).
- [24] Leskovec, J., et al. Community structure in large networks: Natural cluster sizes and the absence of large well-defined clusters. *Internet Mathematics.* **6**(1), 29-123 (2009).
- [25] Opsahl, T., Agneessens, F. & Skvoretz, J. Node centrality in weighted networks: Generalizing degree and shortest paths. *Social Networks.* **3**(32), 245-251 (2010).
- [26] Bollacker, K., Lawrence, S. & Giles, C. L. CiteSeer: An autonomous Web agent for automatic retrieval and identification of interesting publications. *In Proc. Int. Conf. on Autonomous Agents.* 116-123 (1998).
- [27] Šubelj, L. & Bajec, M. Model of complex networks based on citation dynamics. *In Proceedings of the WWW Workshop on*

TABLE I. Statistical characteristics and the theoretical epidemic thresholds of the 56 real-world networks. The statistical characteristics including the network size ( $N$ ), number of edges ( $E$ ), minimum degree ( $k_{min}$ ), maximum degree ( $k_{max}$ ), first ( $\langle k \rangle$ ) and second moments ( $\langle k^2 \rangle$ ) of degree distribution, degree-degree correlations ( $c$ ), clustering ( $c$ ), modularity ( $Q$ ), the inverse participation ratios of the adjacent matrix  $IPR(\Lambda_A^1)$  and non-backtracking matrix  $IPR(\Lambda_M^1)$ . The theoretical epidemic thresholds are the MFL method ( $\lambda_c^{MFL}$ ), the QMF method ( $\lambda_c^{QMF}$ ) and DMP method ( $\lambda_c^{DMP}$ ).

| Category        | Networks                    | Statistical Characteristics of Networks |         |           |                     |                       |        |        |       |                    |                    | Theoretical Epidemic Thresholds |                   |                   |
|-----------------|-----------------------------|-----------------------------------------|---------|-----------|---------------------|-----------------------|--------|--------|-------|--------------------|--------------------|---------------------------------|-------------------|-------------------|
|                 |                             | $N$                                     | $E$     | $k_{max}$ | $\langle k \rangle$ | $\langle k^2 \rangle$ | $r$    | $c$    | $Q$   | $IPR(\Lambda_A^1)$ | $IPR(\Lambda_M^1)$ | $\lambda_c^{MFL}$               | $\lambda_c^{QMF}$ | $\lambda_c^{DMP}$ |
| Coauthorship    | arXiv astro-ph [30]         | 17903                                   | 196972  | 504       | 22.004              | 1445.8                | 0.201  | 0.318  | 0.493 | 0.004              | 0.004              | 0.015                           | 0.011             | 0.011             |
|                 | arXiv hep-ph [30]           | 28045                                   | 3148414 | 4909      | 224.53              | 149810                | 0.033  | 0.28   | 0.408 | 0.0006             | 0.0006             | 0.002                           | 0.001             | 0.001             |
|                 | arXiv hep-th [30]           | 22721                                   | 2444642 | 8718      | 215.19              | 188080                | -0.034 | 0.269  | 0.328 | 0.0008             | 0.0008             | 0.001                           | 0.001             | 0.001             |
|                 | DBLP co-authorship [6]      | 317080                                  | 1049866 | 343       | 6.622               | 144.01                | 0.267  | 0.306  | 0.734 | 0.008              | 0.008              | 0.048                           | 0.009             | 0.009             |
| Social          | Advogato [7]                | 5042                                    | 39227   | 803       | 15.56               | 1284                  | -0.096 | 0.092  | 0.337 | 0.009              | 0.007              | 0.012                           | 0.014             | 0.015             |
|                 | Google+ [8]                 | 23613                                   | 39182   | 2761      | 3.319               | 1251.7                | -0.389 | 0.004  | 0.725 | 0.095              | 0.015              | 0.003                           | 0.016             | 0.021             |
|                 | Twitter (ICWSM) [9]         | 465017                                  | 833540  | 677       | 3.585               | 812.11                | -0.878 | 0.0006 | 0.665 | 0.001              | 0.001              | 0.004                           | 0.012             | 0.013             |
|                 | Twitter lists [29]          | 22322                                   | 31823   | 238       | 2.851               | 112.05                | -0.49  | 0.022  | 0.868 | 0.046              | 0.022              | 0.026                           | 0.042             | 0.050             |
|                 | Facebook (NIPS) [29]        | 2888                                    | 2981    | 769       | 2.0644              | 528.13                | -0.668 | 0.0004 | 0.809 | 0.244              | 0.012              | 0.004                           | 0.036             | 0.134             |
|                 | Gowalla [11]                | 196591                                  | 950327  | 14730     | 9.668               | 2964                  | -0.029 | 0.023  | 0.621 | 0.018              | 0.005              | 0.003                           | 0.006             | 0.006             |
|                 | Epinions [12]               | 75877                                   | 405739  | 3044      | 10.695              | 1966.5                | -0.041 | 0.066  | 0.386 | 0.002              | 0.002              | 0.005                           | 0.005             | 0.006             |
|                 | Hamsterster friendships [4] | 1788                                    | 12476   | 272       | 13.955              | 635.61                | -0.089 | 0.09   | 0.396 | 0.01               | 0.009              | 0.022                           | 0.022             | 0.023             |
|                 | Youtube friendship [6]      | 1134890                                 | 2987624 | 28754     | 5.265               | 2603.7                | -0.037 | 0.006  | 0.632 | 0.048              | 0.005              | 0.002                           | 0.005             | 0.005             |
|                 | Hamsterster full [4]        | 2000                                    | 16098   | 273       | 16.098              | 704.71                | 0.023  | 0.23   | 0.45  | 0.009              | 0.008              | 0.023                           | 0.02              | 0.021             |
|                 | Youtube links [13]          | 1134885                                 | 2987468 | 28747     | 5.265               | 2601.1                | -0.037 | 0.006  | 0.657 | 0.048              | 0.005              | 0.002                           | 0.005             | 0.005             |
|                 | Facebook Friendships [14]   | 63392                                   | 816831  | 1098      | 25.771              | 2268.9                | 0.177  | 0.148  | 0.506 | 0.001              | 0.001              | 0.011                           | 0.008             | 0.008             |
| Brightkite [15] | 56739                       | 212945                                  | 1134    | 7.506     | 480.61              | 0.01                  | 0.111  | 0.591  | 0.006 | 0.006              | 0.016              | 0.010                           | 0.010             |                   |
| Metabolic       | Caenorhabditis elegans [16] | 453                                     | 2025    | 237       | 8.9404              | 358.49                | -0.226 | 0.124  | 0.401 | 0.038              | 0.025              | 0.0256                          | 0.038             | 0.043             |
|                 | Reactome [17]               | 5973                                    | 145778  | 855       | 48.812              | 6995.1                | 0.241  | 0.606  | 0.719 | 0.004              | 0.004              | 0.007                           | 0.005             | 0.005             |
|                 | Human protein (Figeys) [18] | 2217                                    | 6418    | 314       | 5.79                | 324.93                | -0.332 | 0.008  | 0.472 | 0.027              | 0.017              | 0.018                           | 0.032             | 0.036             |
|                 | Human protein (Stelzl) [19] | 1615                                    | 3106    | 95        | 3.846               | 65.648                | -0.202 | 0.006  | 0.601 | 0.02               | 0.016              | 0.062                           | 0.057             | 0.065             |
|                 | PDZBase [20]                | 161                                     | 209     | 21        | 2.596               | 15.255                | -0.466 | 0.003  | 0.755 | 0.1                | 0.05               | 0.205                           | 0.171             | 0.248             |
|                 | Human protein (Vidal) [21]  | 2783                                    | 6007    | 129       | 4.317               | 68.103                | -0.137 | 0.035  | 0.615 | 0.029              | 0.012              | 0.068                           | 0.063             | 0.076             |
| Infrastructure  | California [22]             | 1957027                                 | 2760388 | 12        | 2.821               | 8.9412                | 0.121  | 0.06   | 0.991 | 0.085              | 0.032              | 0.461                           | 0.216             | 0.301             |
|                 | Euroroad [23]               | 1039                                    | 1305    | 10        | 2.512               | 7.7536                | 0.09   | 0.035  | 0.862 | 0.0493             | 0.016              | 0.479                           | 0.249             | 0.391             |
|                 | Texas [24]                  | 1351137                                 | 1879201 | 12        | 2.782               | 8.75                  | 0.127  | 0.06   | 0.99  | 0.112              | 0.041              | 0.466                           | 0.204             | 0.281             |
|                 | Pennsylvania [24]           | 1087562                                 | 1541514 | 9         | 2.835               | 9.07                  | 0.122  | 0.059  | 0.988 | 0.109              | 0.027              | 0.455                           | 0.226             | 0.322             |
|                 | Air traffic control [4]     | 1226                                    | 2408    | 34        | 3.928               | 28.899                | -0.015 | 0.064  | 0.686 | 0.019              | 0.012              | 0.157                           | 0.109             | 0.134             |
|                 | OpenFlights [25]            | 2905                                    | 15645   | 242       | 10.771              | 601.45                | 0.049  | 0.255  | 0.581 | 0.01               | 0.009              | 0.018                           | 0.016             | 0.016             |
| Citation        | arXiv hep-ph [30]           | 34401                                   | 420784  | 846       | 24.463              | 1553.4                | -0.006 | 0.146  | 0.553 | 0.004              | 0.003              | 0.016                           | 0.013             | 0.013             |
|                 | arXiv hep-th [30]           | 27400                                   | 352021  | 2468      | 25.695              | 2733.8                | -0.03  | 0.12   | 0.523 | 0.009              | 0.005              | 0.009                           | 0.009             | 0.009             |
|                 | CiteSeer [26]               | 365154                                  | 1721981 | 1739      | 9.432               | 456.97                | -0.063 | 0.05   | 0.664 | 0.018              | 0.007              | 0.021                           | 0.017             | 0.019             |
|                 | Cora citation [27]          | 23166                                   | 89157   | 377       | 7.697               | 182.3                 | -0.055 | 0.117  | 0.683 | 0.01               | 0.008              | 0.044                           | 0.032             | 0.034             |
|                 | DBLP [28]                   | 12495                                   | 49563   | 709       | 7.933               | 347.28                | -0.046 | 0.062  | 0.538 | 0.028              | 0.011              | 0.023                           | 0.023             | 0.026             |
| Misc            | Flickr [29]                 | 105722                                  | 2316668 | 5425      | 43.826              | 15304                 | 0.247  | 0.402  | 0.634 | 0.001              | 0.001              | 0.003                           | 0.002             | 0.002             |
|                 | Amazon (TWEB) [30]          | 403364                                  | 2443311 | 2752      | 12.115              | 370.15                | -0.018 | 0.166  | 0.74  | 0.089              | 0.005              | 0.034                           | 0.017             | 0.025             |
| HumanSocial     | Jazz musicians [31]         | 198                                     | 2742    | 100       | 27.697              | 1070.2                | 0.02   | 0.52   | 0.439 | 0.014              | 0.014              | 0.027                           | 0.025             | 0.026             |
|                 | Adolescent health [32]      | 2539                                    | 10455   | 27        | 8.236               | 86.414                | 0.251  | 0.142  | 0.597 | 0.022              | 0.017              | 0.105                           | 0.076             | 0.084             |
|                 | Physicians [33]             | 117                                     | 465     | 26        | 7.949               | 79.162                | -0.084 | 0.175  | 0.372 | 0.025              | 0.018              | 0.112                           | 0.099             | 0.114             |
| Computer        | Route views [30]            | 6474                                    | 12572   | 1458      | 3.884               | 640.08                | -0.182 | 0.01   | 0.612 | 0.087              | 0.022              | 0.006                           | 0.022             | 0.029             |
|                 | CAIDA [30]                  | 26475                                   | 53381   | 2628      | 4.033               | 1130.1                | -0.195 | 0.007  | 0.639 | 0.024              | 0.01               | 0.004                           | 0.014             | 0.017             |
|                 | Gnutella [34]               | 62561                                   | 147878  | 95        | 4.728               | 54.86                 | -0.093 | 0.004  | 0.502 | 0.001              | 0.001              | 0.094                           | 0.076             | 0.087             |
| Communication   | U. Rovira i Virgili [35]    | 1133                                    | 5451    | 71        | 9.622               | 179.82                | 0.078  | 0.166  | 0.511 | 0.01               | 0.008              | 0.057                           | 0.048             | 0.052             |
|                 | EU institution [30]         | 224832                                  | 339925  | 7636      | 3.024               | 1716.5                | -0.189 | 0.004  | 0.729 | 0.003              | 0.003              | 0.002                           | 0.01              | 0.01              |
| Lexical         | WordNet [36]                | 145145                                  | 656230  | 1008      | 9.042               | 503.2                 | -0.063 | 0.096  | 0.704 | 0.028              | 0.024              | 0.018                           | 0.014             | 0.015             |
|                 | King James [4]              | 1707                                    | 9059    | 364       | 10.614              | 441.85                | -0.052 | 0.162  | 0.461 | 0.023              | 0.017              | 0.025                           | 0.025             | 0.027             |
|                 | David Copperfield [37]      | 112                                     | 425     | 49        | 7.589               | 104.54                | -0.129 | 0.157  | 0.295 | 0.047              | 0.034              | 0.078                           | 0.076             | 0.087             |
| Hyperlink       | Google.com internal [38]    | 15763                                   | 148585  | 11401     | 18.852              | 16998                 | -0.122 | 0.013  | 0.48  | 0.043              | 0.021              | 0.001                           | 0.006             | 0.006             |
|                 | Notre Dame [39]             | 325729                                  | 1090108 | 10721     | 6.693               | 1878.7                | -0.053 | 0.088  | 0.927 | 0.023              | 0.008              | 0.004                           | 0.005             | 0.006             |
|                 | Stanford [24]               | 255265                                  | 1941926 | 38625     | 15.215              | 30898                 | -0.116 | 0.009  | 0.892 | 0.024              | 0.022              | 0.0005                          | 0.002             | 0.002             |
| Trophic         | Little Rock Lake [40]       | 183                                     | 2434    | 105       | 26.601              | 1140.9                | -0.267 | 0.332  | 0.345 | 0.015              | 0.014              | 0.024                           | 0.024             | 0.025             |
|                 | Florida ecosystem dry [41]  | 128                                     | 2106    | 110       | 32.906              | 1332.7                | -0.104 | 0.314  | 0.146 | 0.015              | 0.014              | 0.025                           | 0.025             | 0.026             |
|                 | Florida ecosystem wet [41]  | 128                                     | 2075    | 110       | 32.422              | 1300.3                | -0.112 | 0.312  | 0.137 | 0.015              | 0.014              | 0.026                           | 0.025             | 0.026             |
| Animal Animal   | Dolphins [42]               | 62                                      | 159     | 12        | 5.129               | 34.903                | -0.044 | 0.309  | 0.495 | 0.053              | 0.044              | 0.172                           | 0.139             | 0.167             |
| OnlineContact   | Pretty Good Privacy [43]    | 10680                                   | 24316   | 205       | 4.554               | 85.976                | 0.238  | 0.378  | 0.847 | 0.017              | 0.016              | 0.056                           | 0.024             | 0.024             |
| Software        | Linux [4]                   | 30817                                   | 213208  | 9338      | 13.837              | 11798                 | -0.175 | 0.003  | 0.427 | 0.026              | 0.015              | 0.001                           | 0.006             | 0.006             |

*Large Scale Network Analysis*. 527-530 (2013).

- [28] Ley, M. The DBLP computer science bibliography: Evolution, research issues, perspectives. *In Proc. Int. Symposium on String Processing and Information Retrieval*. 1-10 (2002).
- [29] McAuley, J. & Leskovec, J. Learning to discover social circles in ego networks. *In Advances in Neural Information Processing Systems*. 548-556 (2012).
- [30] Leskovec, J., Adamic, L. A. & Huberman, B. A. The dynamics of viral marketing. *ACM Trans. on the Web*. **1**(1) (2007).

- [31] Gleiser, P. M. & Danon, L. Community structure in jazz. *Advances in Complex Systems*. **6**(4), 565-573 (2003).
- [32] Moody, J. Peer influence groups: Identifying dense clusters in large networks. *Social Networks*. **23**(4), 261-283 (2001).
- [33] Coleman, J., Katz, E. & Menzel, H. The diffusion of an innovation among physicians. *Sociometry*. 253-270 (1957).
- [34] Ripeanu, M., Foster, I. & Iamnitchi, A. Mapping the Gnutella network: Properties of large-scale peer-to-peer systems and implications for system design. *IEEE Internet Computing J.* **6** (2002).

- [35] Guimerà, R., *et al.* Self-similar community structure in a network of human interactions. *Phys. Rev. E* **68**(6), 065103 (2003).
- [36] Fellbaum, C. *WordNet: an Electronic Lexical Database* (MIT Press, 1998).
- [37] Newman, M. E. J. Finding community structure in networks using the eigenvectors of matrices. *Phys. Rev. E* **74**(3), 036104 (2006).
- [38] Palla, G., *et al.* Directed network modules. *New J. Phys.* **9**(6), 186 (2007).
- [39] Albert, R., Jeong, H. & Barabási, A.-L. Internet: Diameter of the world-wide web. *Nature*. **401**(6749), 130-131 (1999).
- [40] Martinez, N. D., *et al.* Artifacts or attributes? effects of resolution on the Little Rock Lake food web. *Ecological Monographs*. **61**, 367-392 (1991).
- [41] Ulanowicz, R. E., *et al.* Annual Report to the United States Geological Service Biological Resources Division Ref. No.[UMCES] CBL 00-0176, Chesapeake Biological Laboratory, University of Maryland (2000).
- [42] Lusseau, D., *et al.* The bottlenose dolphin community of Doubtful Sound features a large proportion of long-lasting associations. *Behavioral Ecology and Sociobiology*. **54**, 396-405 (2003).
- [43] Boguñá, M., *et al.* Models of social networks based on social distance attachment. *Phys. Rev. E* **70**(5), 056122 (2004).
